# Supplementary material for: Glutathione Regulates GPx1 Expression during CA1 Neuronal Death and Clasmatodendrosis in the Rat Hippocampus following Status Epilepticus
Source: MDPI journal article supplement (doi:10.3390/antiox11040756), 2022-04-11
Supplement: s1 [file s1]

**Supplementary information**

**Glutathione regulates GPx1 expression during CA1 neuronal death and clasmatodendrosis in the rat hippocampus following status epilepticus**

**Ji-Eun Kim<sup>1\*</sup>, Duk-Shin Lee<sup>1</sup>, Tae-Hyun Kim<sup>1</sup> and Tae-Cheon Kang<sup>1,\*</sup>**

<sup>1</sup> Department of Anatomy and Neurobiology and Institute of Epilepsy Research, College of Medicine, Hallym University, Chuncheon 24252, Korea; dslee84@hallym.ac.kr (D-SL), hyun1028@hallym.ac.kr (T.-H.K.).

\* Correspondence: jieunkim@hallym.ac.kr; Tel: +82-33-248-2524; Fax: +82-33-248-2525 and tckang@hallym.ac.kr; Tel: +82-33-248-2524; Fax: +82-33-248-2525.

**Fig. 1A**

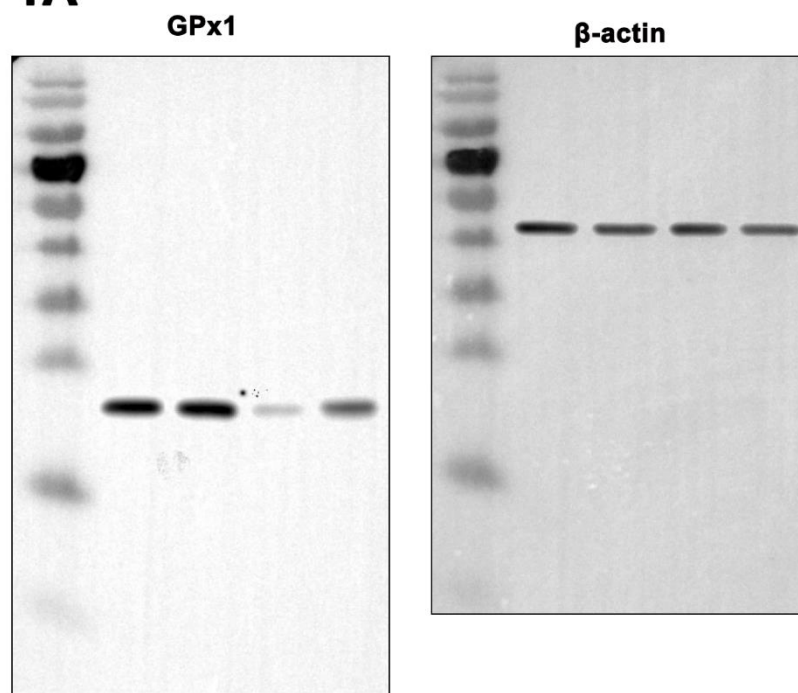

**Supplementary Figure S1.** Full-length gel images of Western blot data in Figure 1A.
